# Supplementary material for: The Transcriptional Corepressor HOS15 Mediates Dark-Induced Leaf Senescence in Arabidopsis
Source: Frontiers journal article supplement (doi:10.3389/fpls.2022.828264), 2022-02-25
Supplement: Data_Sheet_1.PDF [file Data_Sheet_1.PDF]

## Supplementary Material

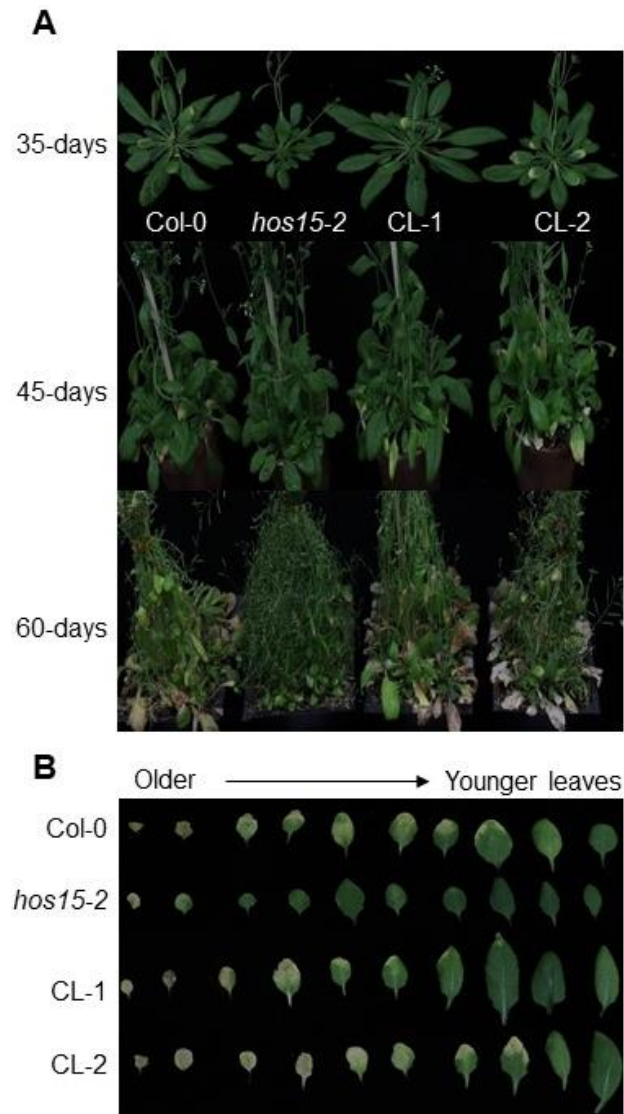

**Supplementary Figure 1. (ref. to Figure 1A/B).** HOS15 mediates senescence in an age-dependent manner. (A) HOS15 positively regulates plant senescence in an age-dependent manner. Phenotypic analysis of Col-0 (WT), *hos15-2*, and two complemented lines (HOS15::*HOS15/hos15-2*), CL-1 and CL-2, after 35, 45, and 60 days of germination. The seeds of Col-0, *hos15-2*, CL-1, and CL-2 were grown on MS medium for 12 days and then transferred to soil. (B) Rosette leaf phenotypes of Col-0, *hos15-2*, CL-1, and CL-2 plants after 45 days of germination. The rosette leaves (3<sup>rd</sup>-12<sup>th</sup> leaves) were arranged according to their age (from older to younger leaves).

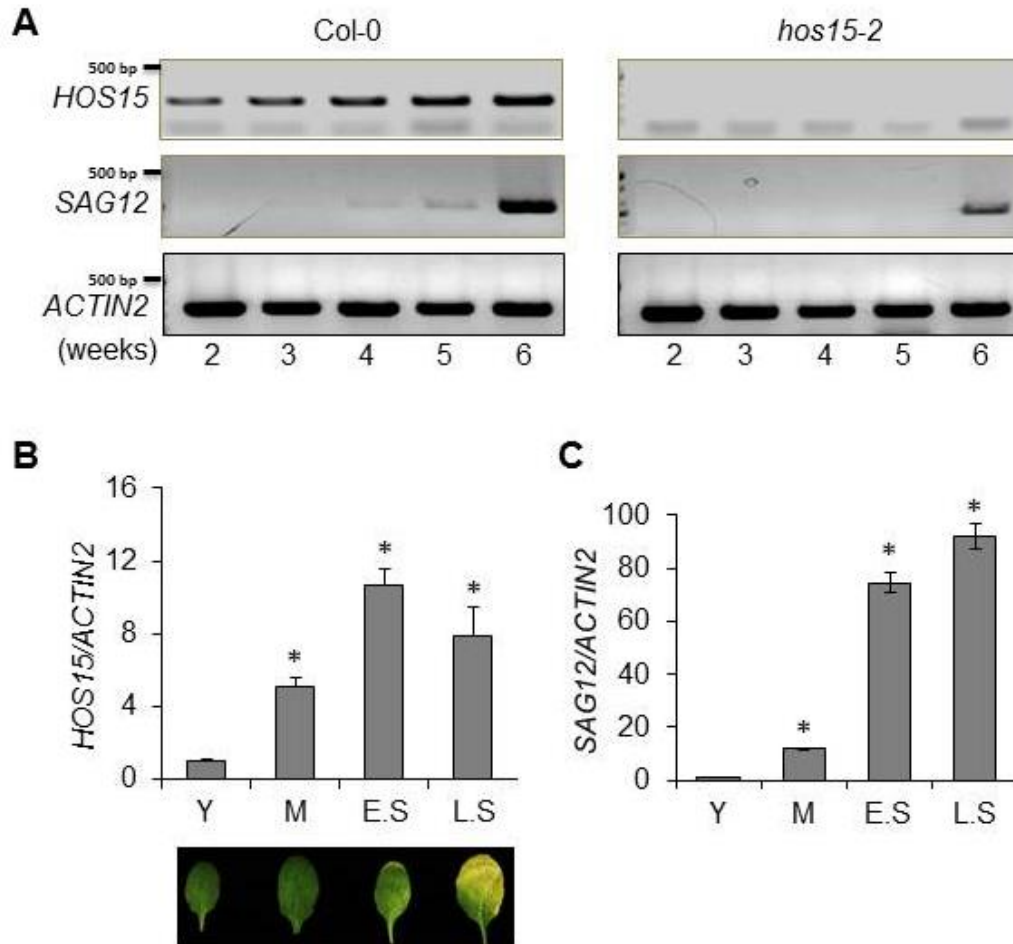

**Supplementary Figure 2. (ref. to Figure 1A,B).** HOS15 mediates senescence in an age-dependent manner. (A) The mRNA expression analysis of HOS15 and SAG15 genes in Col-0 and *hos15-2* plants in an age-dependent manner. Seeds of Col-0 (WT) and loss-of-function HOS15 (*hos15-2*) plants were grown on MS medium, and 12-days-old seedlings were transferred to soil. The 3<sup>rd</sup> and 4<sup>th</sup> rosette leaves of both plants were sampled according to the mentioned ages (2-6-weeks-old 3<sup>rd</sup> and 4<sup>th</sup> rosette leaves) for RNA extraction and cDNA synthesis. Transcript levels of HOS15 and SAG12 were analyzed using qRT-PCR. ACTIN2 was used as the internal control. (B and C) The expression of HOS15 and SAG12 was analyzed by qRT-PCR according to their age (Y=Young, M=Mature, ES=Early Senescence, and LS=Late Senescence) in Col-0 plants. ACTIN2 was used as the normalization control. Error bars represent the SD of three independent biological replicates. Significant differences were tested using Student's *t*-test (\**P* < 0.05).

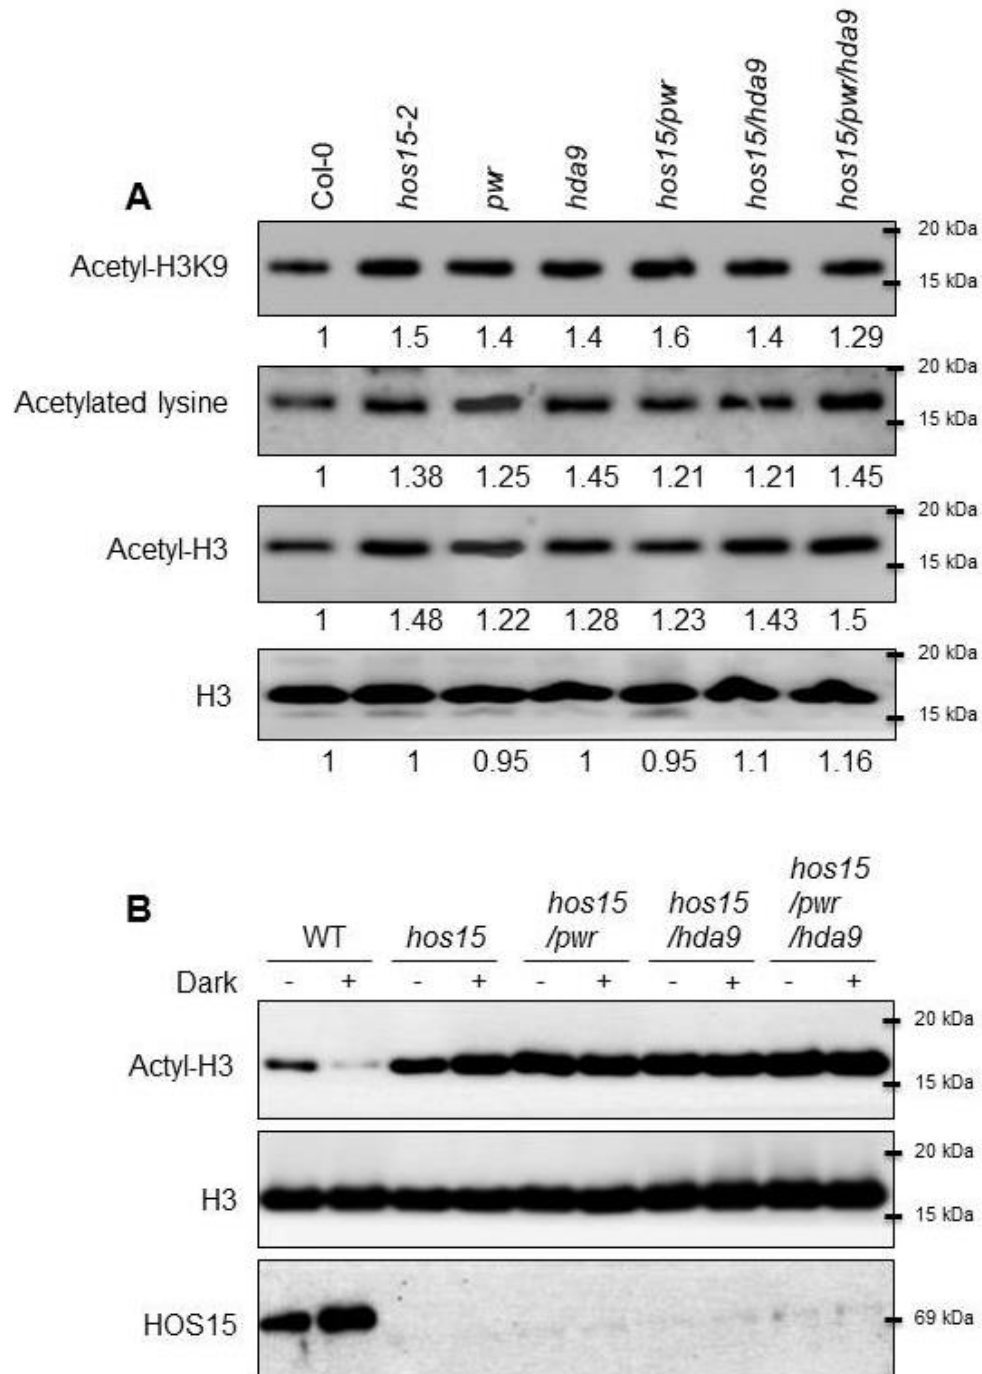

**Supplementary Figure 3. The HOS15-PWR-HDA9 complex participates equally in histone deacetylation during senescence.** (A) Comparative analysis of H3 acetylation status during early senescence. The nuclear proteins of Col-0 (WT), *hos15-2*, *pwr*, *hda9*, *hos15pwr*, *hos15hda9*, and *hos15pwrhda9* mutants were extracted from early senescent leaves. Anti-H3, Anti-AcH3, Anti-H3K9, anti-AcK antibodies were used for H3 analysis. Anti-H3 antibody was used as the loading control. Each experiment was repeated three times with similar results. **In the bottom of each blot band intensities have been calculated using image J software.** (B) HOS15 together with HDA9 and PWR regulates dark-induced senescence by affecting H3 acetylation status. 12-day-old seedlings of Col-0

and *hos15-2* plants were treated with 4 days of darkness, and then nuclear proteins were extracted. H3, AcH3 and HOS15 antibodies were used for WB. H3 was used as the loading control.

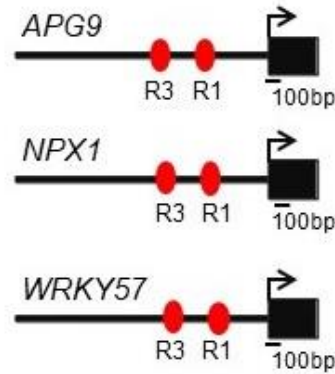

**Supplementary Figure 4. HOS15 associates with APG9, NPX1 and WRKY57 promoter regions.** (A) schematic representation of the APG9, NPX1 and WRKY57 promoter and amplicon regions (R1 and R3) for ChIP-qRT-PCR. These regions are modified from Chen et al. 2016, mentioned as P1, P2 and P3 (here P2=R1 and P3=R3). Primer positions are indicated with R1 and R3. The arrow indicates the transcription start site.

**Supplementary Table 1. Primers used in the study**

| <b>PRIMER SEQUENCE</b> |                                    |
|------------------------|------------------------------------|
| SAG12-F                | CAGCTGCGGATGTTGTTG                 |
| SAG12-R                | CCACTTTCTCCCCATTTTG                |
| SAG29-F                | CTGTTTTTCGCTGCCCTC                 |
| SAG29-R                | ACAGCCCTAGTACGAATCCCAC             |
| ORE1-F                 | ACGTGCCGATGGTACAAAGGTTT            |
| ORE1-R                 | TCTTGGTCGGAGAAGCAGGTCAC            |
| CAB1-F                 | GCAAGGACCCGTGAACTAGAA              |
| CAB1-R                 | TCCGAACTTGACTCCGTTTC               |
| RCBS1A-F               | CGCTCCTTTCAACGGACTTA               |
| RCBS1A-R               | AGTAATGTCGTTAGCCTTGC               |
| ACTIN2-F               | AACCACTATGTTCTCAGGCATCG            |
| ACTIN2-R               | CCTGGACCTGCCTCATCATACT             |
| HOS15-F                | GATGGCCAAGCAAGAATCTG               |
| HOS15-R                | TCCTGTAGGGCTCCATCTGA               |
| <b>WRKY57- R1-F</b>    | <b>CACTGCACTTTAACGGGTTTCAAAGT</b>  |
| <b>tssWRKY57- R1-R</b> | <b>GATCGGCGAGAGAAGTAGTGATAAGAG</b> |
| <b>tssNPX1- R1-F</b>   | <b>AGCTCTCGATCTAGGGTTTTCC</b>      |
| <b>tssNPX1- R1-R</b>   | <b>CTCAACGGCAATTGGCAAAAA</b>       |

|               |                         |
|---------------|-------------------------|
| tssAPG9- R1-F | AGAAGAGGAAGAGAACTCGTGAT |
| tssAPG9- R1-R | TTGATGCTTTGGAGTTTGGAGT  |
| WRKY57- R3-F  | GTCGGTGGCAGTTGGAGTAA    |
| WRKY57- R3-R  | ACGTGAGACGCTTTTTGACC    |
| ACTIN7 F CHIP | CGTTTCGCTTTCCTTAGTGTTA  |
| ACTIN7 R CHIP | AGCGAACGGATCTAGAGCTC    |
| APG9- R3-F    | AGGTGATTTGCATTGTGGATGCT |
| APG9- R3-R    | CGATTGGCCAAAACAGCCG     |
| NPX1- R3-F    | TCCACCAGGAAATCAGTTCCATA |
| NPX1-R3-R     | ATCGGTGCTACTTCGAAAGGG   |
